# Supplementary material for: Airway epithelial cell identity and plasticity are constrained by Sox2 during lung homeostasis, tissue regeneration, and in human disease
Source: PubMed Central journal article supplement (PMC10770358; doi:10.1038/s41536-023-00344-w), 2024-01-05
Supplement: 41536_2023_344_MOESM1_ESM.pdf [file 41536_2023_344_MOESM1_ESM.pdf]

# Supplementary Figure 1

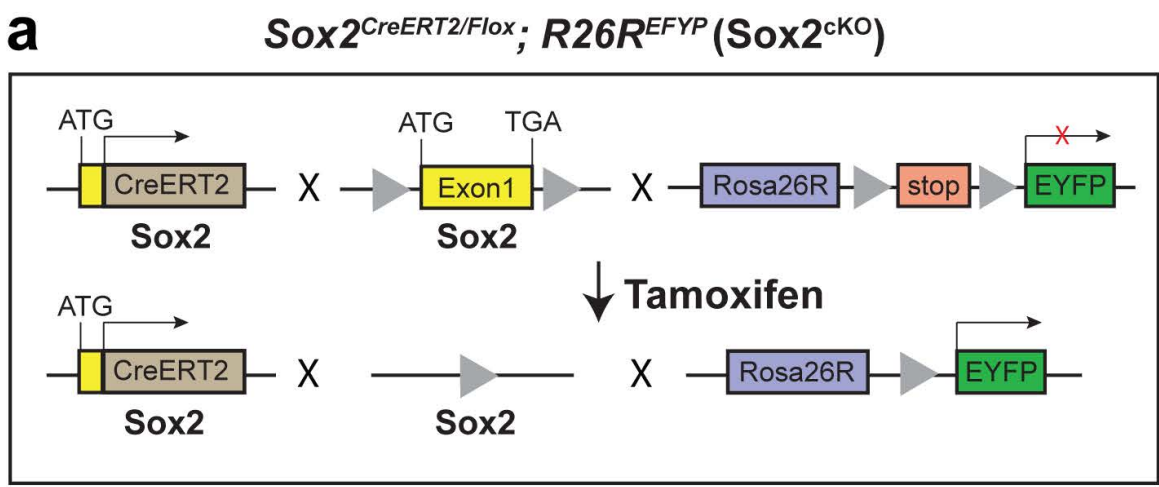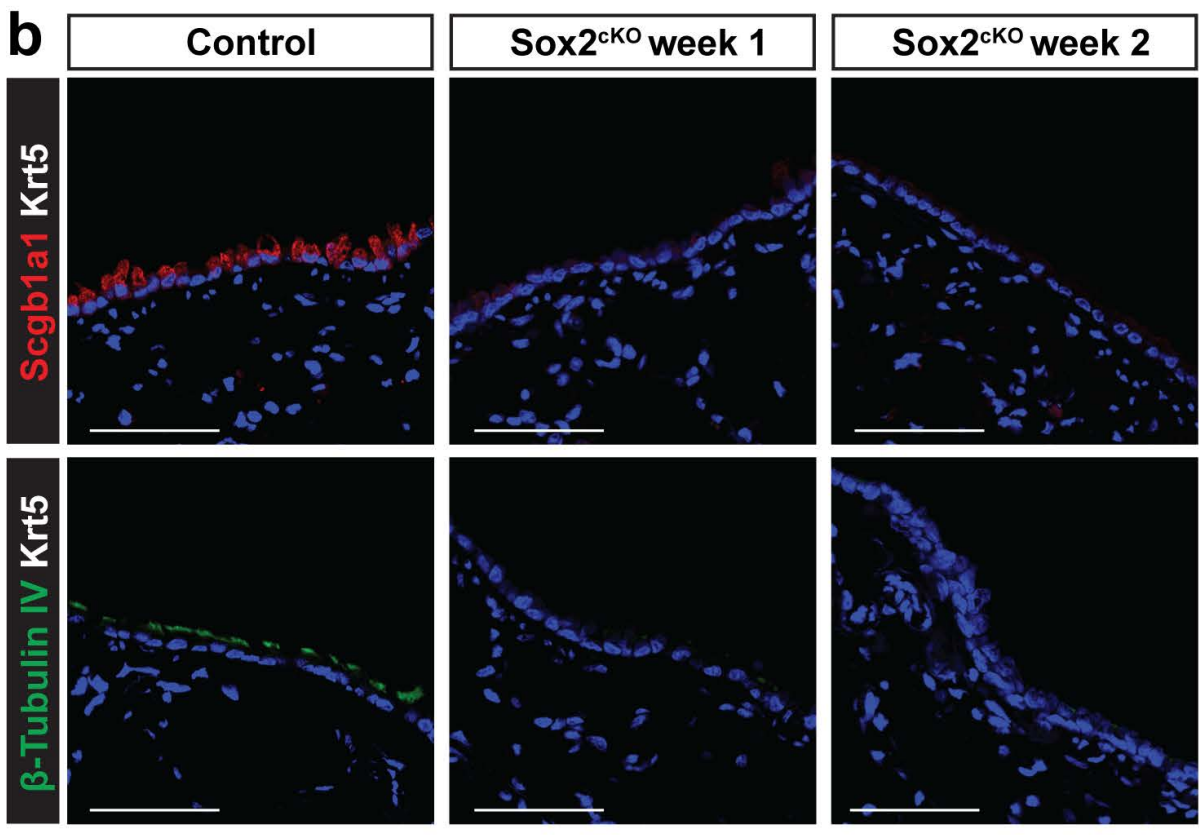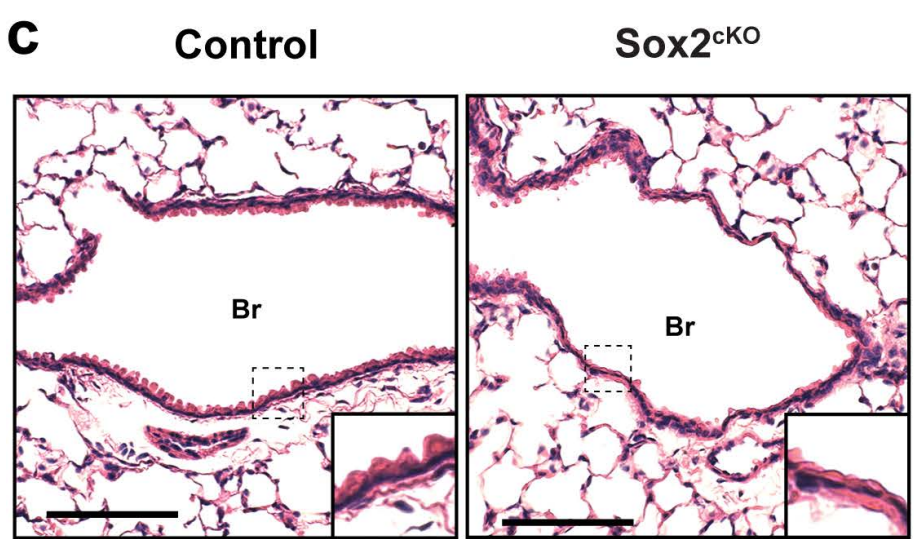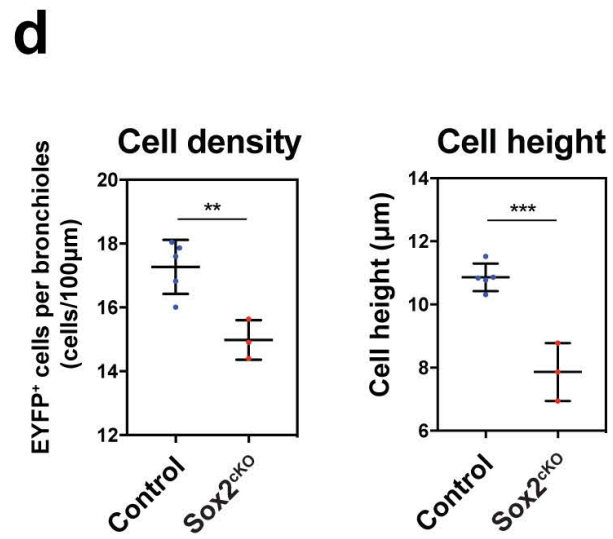

## Supplementary Figure 1. Sox2 conditional knockout strategy

- a. Diagram illustrates strategy for deleting Sox2 in airway cells using  $Sox2^{CreERT2/Flox}; R26R^{EYFP}$  mice.
- b. Control and Sox2<sup>ckO</sup> mice were given tamoxifen and analyzed 7 or 14 days later. Secretory cell marker Scgb1a1 and ciliated cell marker  $\beta$ -Tubulin IV are downregulated in Sox2<sup>ckO</sup> mice.
- c. Representative HE pictures from control and Sox2<sup>ckO</sup> mice.
- d. Quantification for the cell density and cell height. N = 5 control and n = 3 Sox2<sup>ckO</sup> mice. \*\*\* P < 0.001 and \*\* P < 0.01 by two-tailed t-test. Each dot represents an individual mouse, and error bars indicate mean with s.d.

Scale bars: c, 100  $\mu$ m; b, 50  $\mu$ m.

# Supplementary Figure 2

**a**

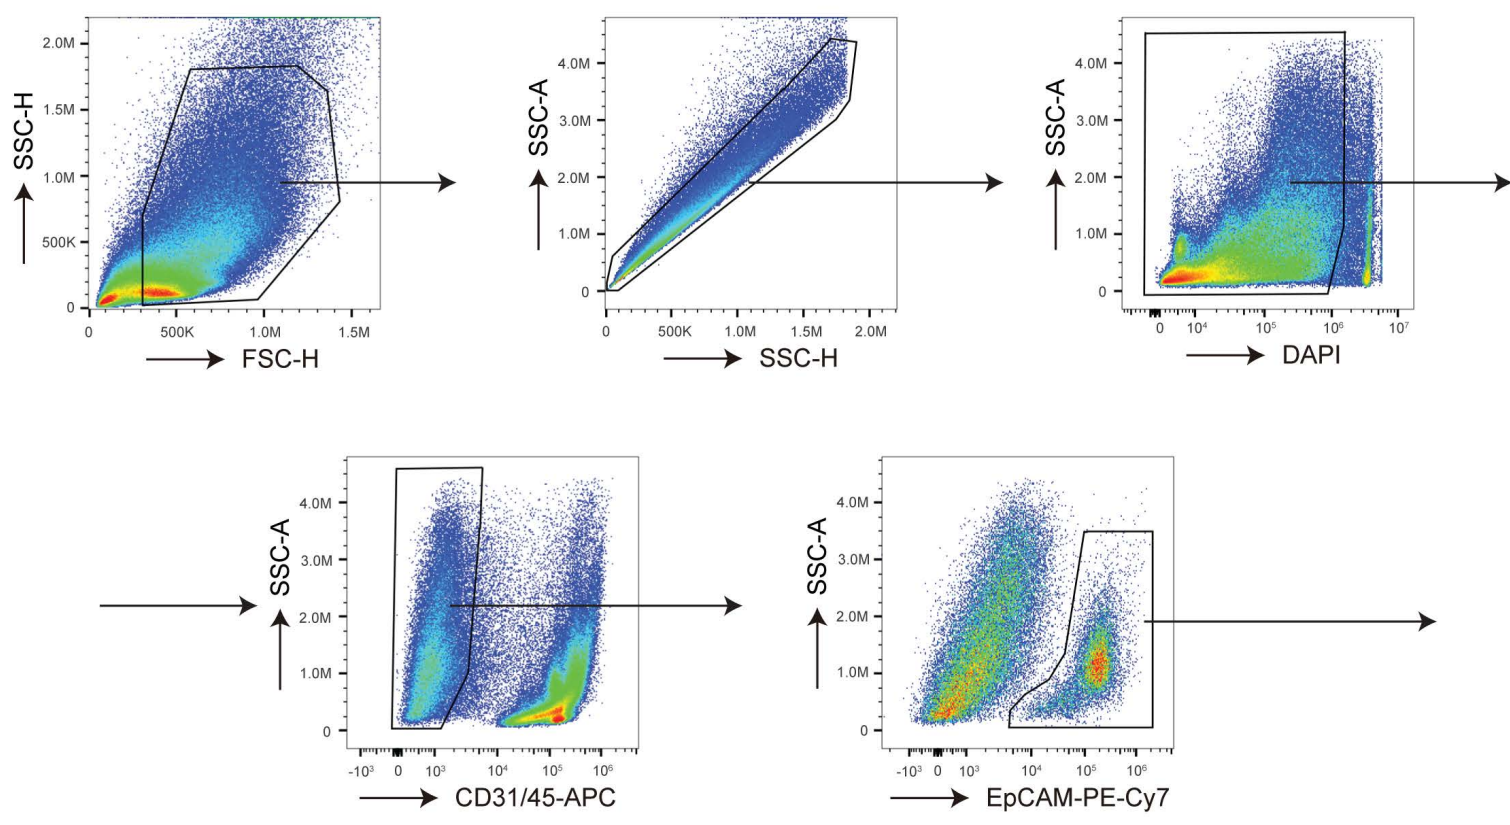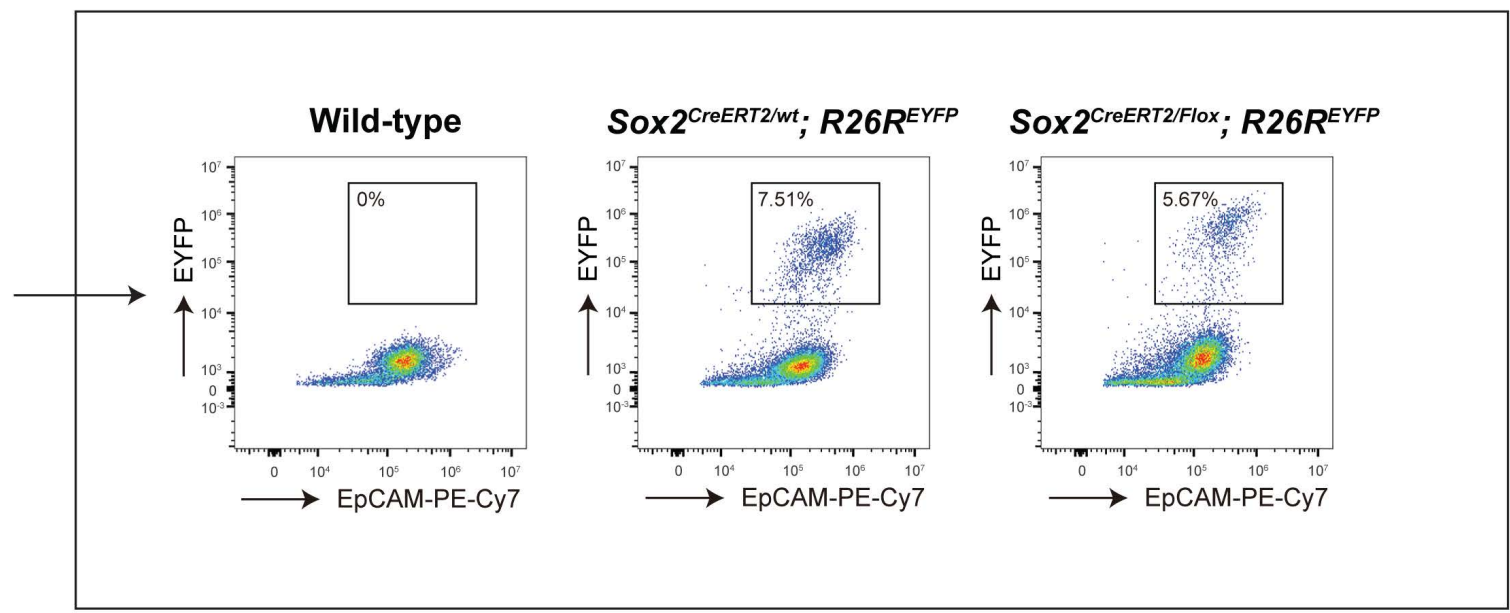

**b**

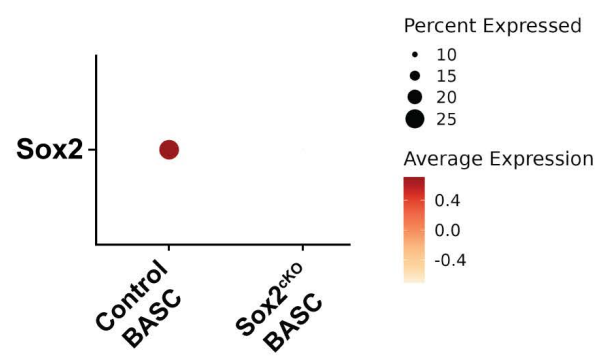

## Supplementary Figure 2. FACS gating strategy and Sox2 expression in BASCs

a. A representative FACS gating strategy that was used in this study for the isolation of DAPI<sup>-</sup> CD31<sup>-</sup> CD45<sup>-</sup> EpCAM<sup>+</sup> EYFP<sup>+</sup> airway cells from *Sox2<sup>CreERT2/wt</sup>; R26R<sup>EYFP</sup>* (control) and *Sox2<sup>CreERT2/Flox</sup>; R26R<sup>EYFP</sup>* (*Sox2<sup>ckO</sup>*) mice.

b. Dotplot showing Sox2 expression in BASCs.

# Supplementary Figure 3

**a**

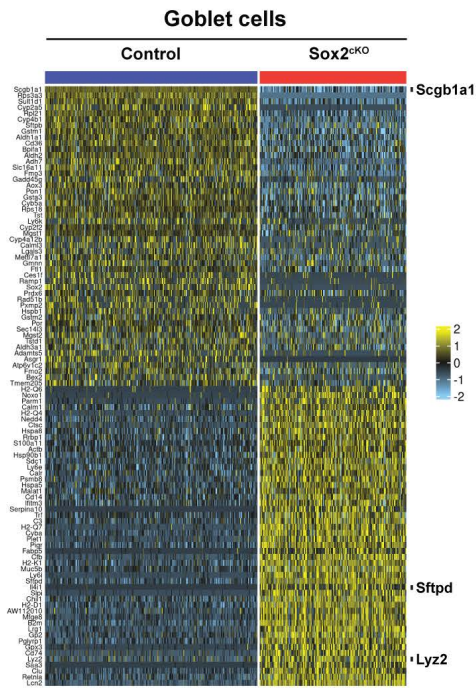

**b**

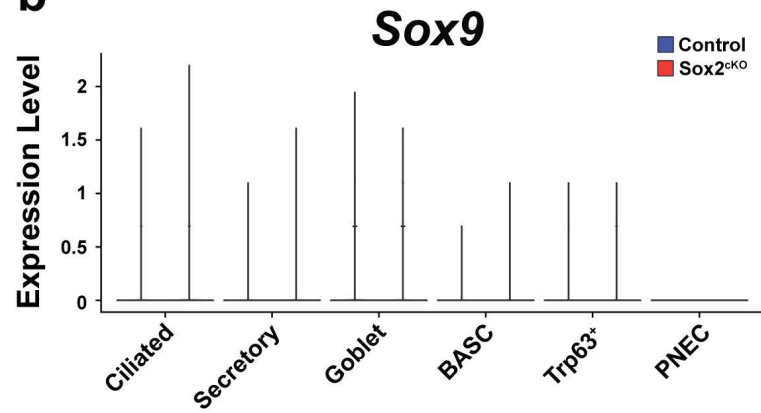

**c**

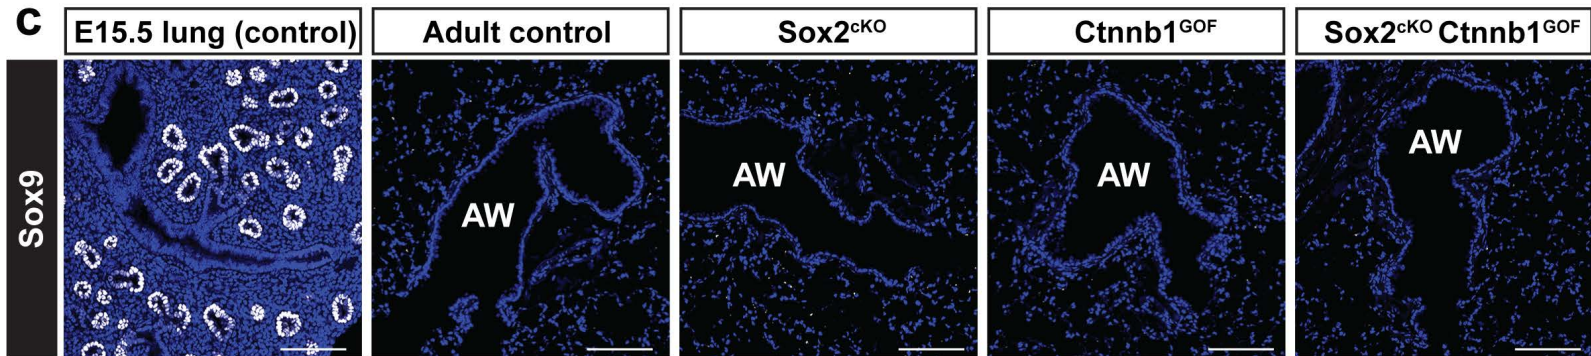

**d**

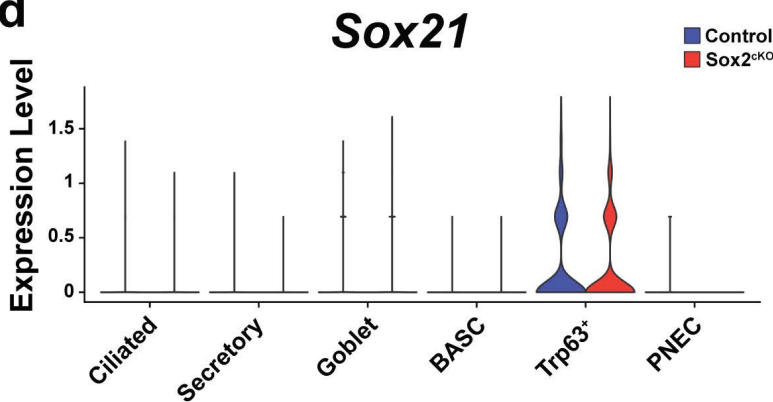

### Supplementary Figure 3. Additional scRNA-seq analysis

- a. Heatmap showing the top 50 differentially expressed genes for goblet cells.
- b. Violin plot showing Sox9 expression in control and Sox2<sup>ckO</sup> mice.
- c. Control, Sox2<sup>ckO</sup>, Ctnnb1<sup>GOF</sup> (related to Figure 5), and Sox2<sup>ckO</sup>/Ctnnb1<sup>GOF</sup> (related to Figure 5) lungs were negative for Sox9. Scale bars: 100  $\mu$ m.
- d. Violin plot showing Sox21 expression in control and Sox2<sup>ckO</sup> mice.

# Supplementary Figure 4

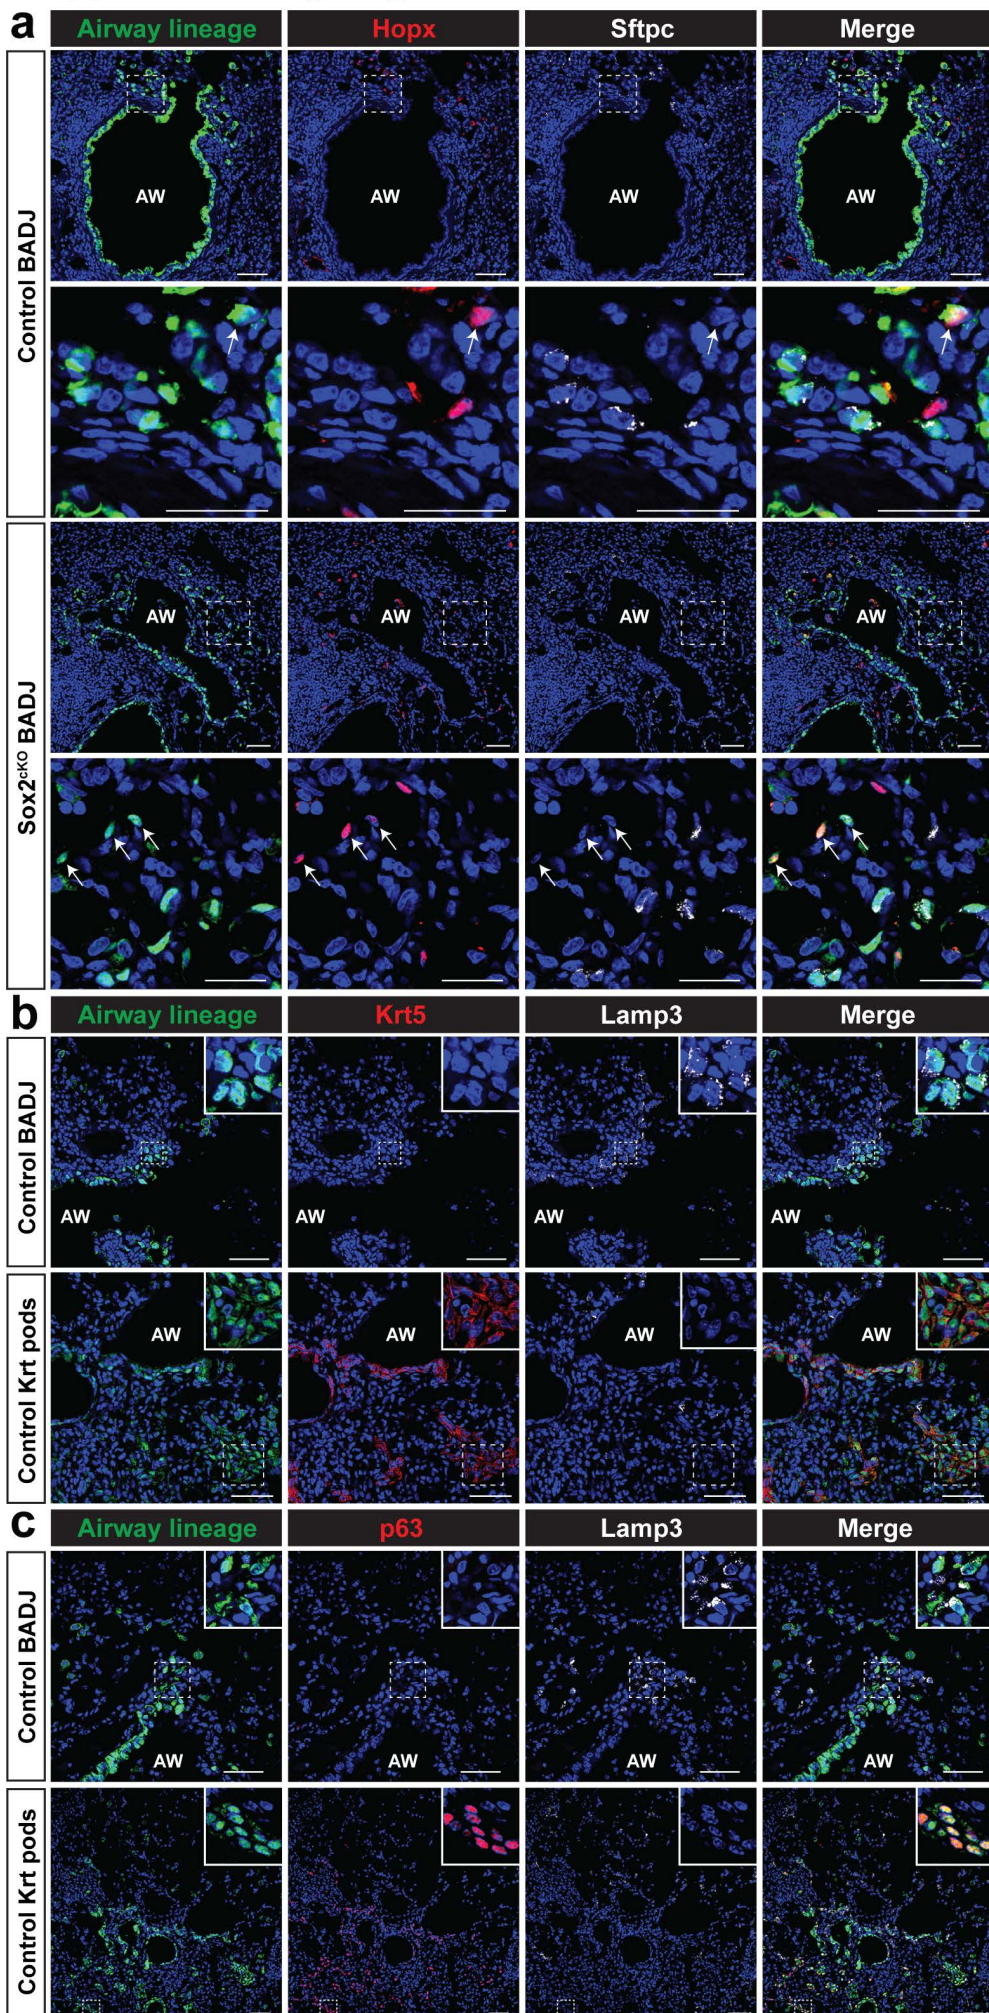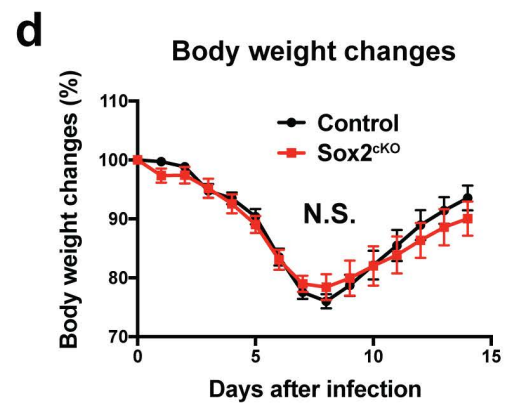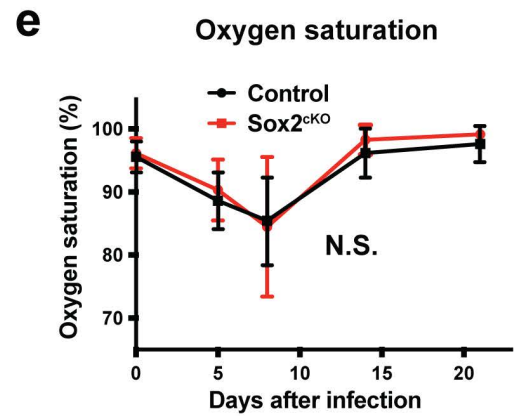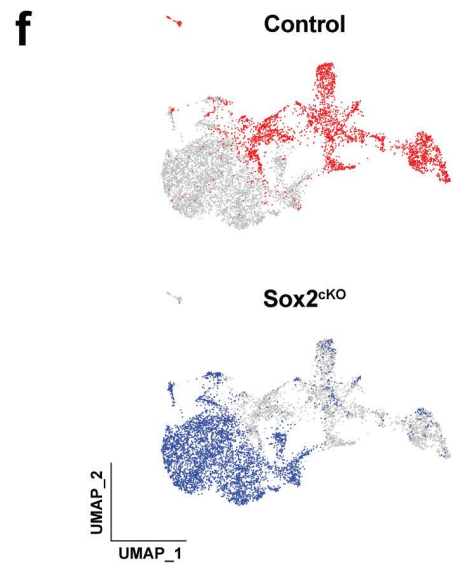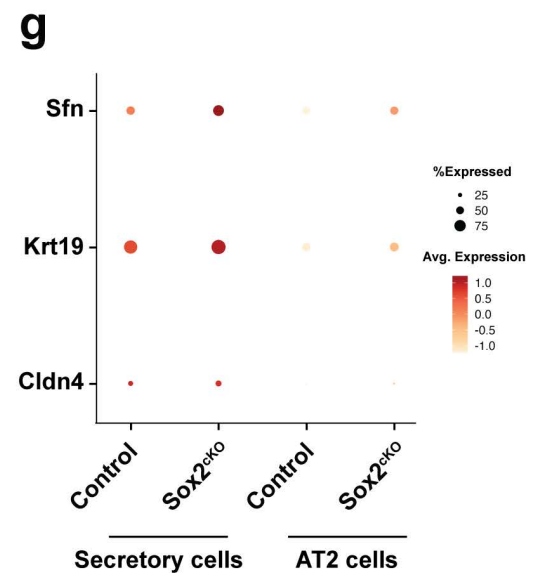

#### Supplementary Figure 4. Additional analysis on influenza infection experiment

a. Low magnification and high magnification images from influenza infection showing airway-derived Hopx<sup>+</sup> AT1 cells. Arrows indicate AT1 cells.

b-c. Airway-derived AT2 cells do not express Krt5 (b) or p63 (c). Krt5<sup>+</sup> (b) or p63<sup>+</sup> (c) dysplastic epithelium does not express AT2 cell marker Lamp3.

d. There were no changes in body weight trends after influenza infection. N = 13 control and n = 11 Sox2<sup>ckO</sup> mice from 6 experiments.

e. Measurement of oxygen saturation in n = 8 control and n = 12 Sox2<sup>ckO</sup> mice.

f. UMAP showing lineage traced populations of EYFP<sup>+</sup> cells from control (red) and Sox2<sup>ckO</sup> (blue) mice 28 days after influenza infection.

g. Dotplot showing expression of Sfn, Krt19, and Cldn4 in secretory and AT2 cells after influenza infection.

Scale bars: a (low magnification), b, and c, 50  $\mu$ m; a (high magnification), 25  $\mu$ m.

N.S., not significant,  $P > 0.05$  by two-tailed t-test. Each dot represents an individual mouse, and error bars indicate mean with s.d.



# Supplementary Figure 5

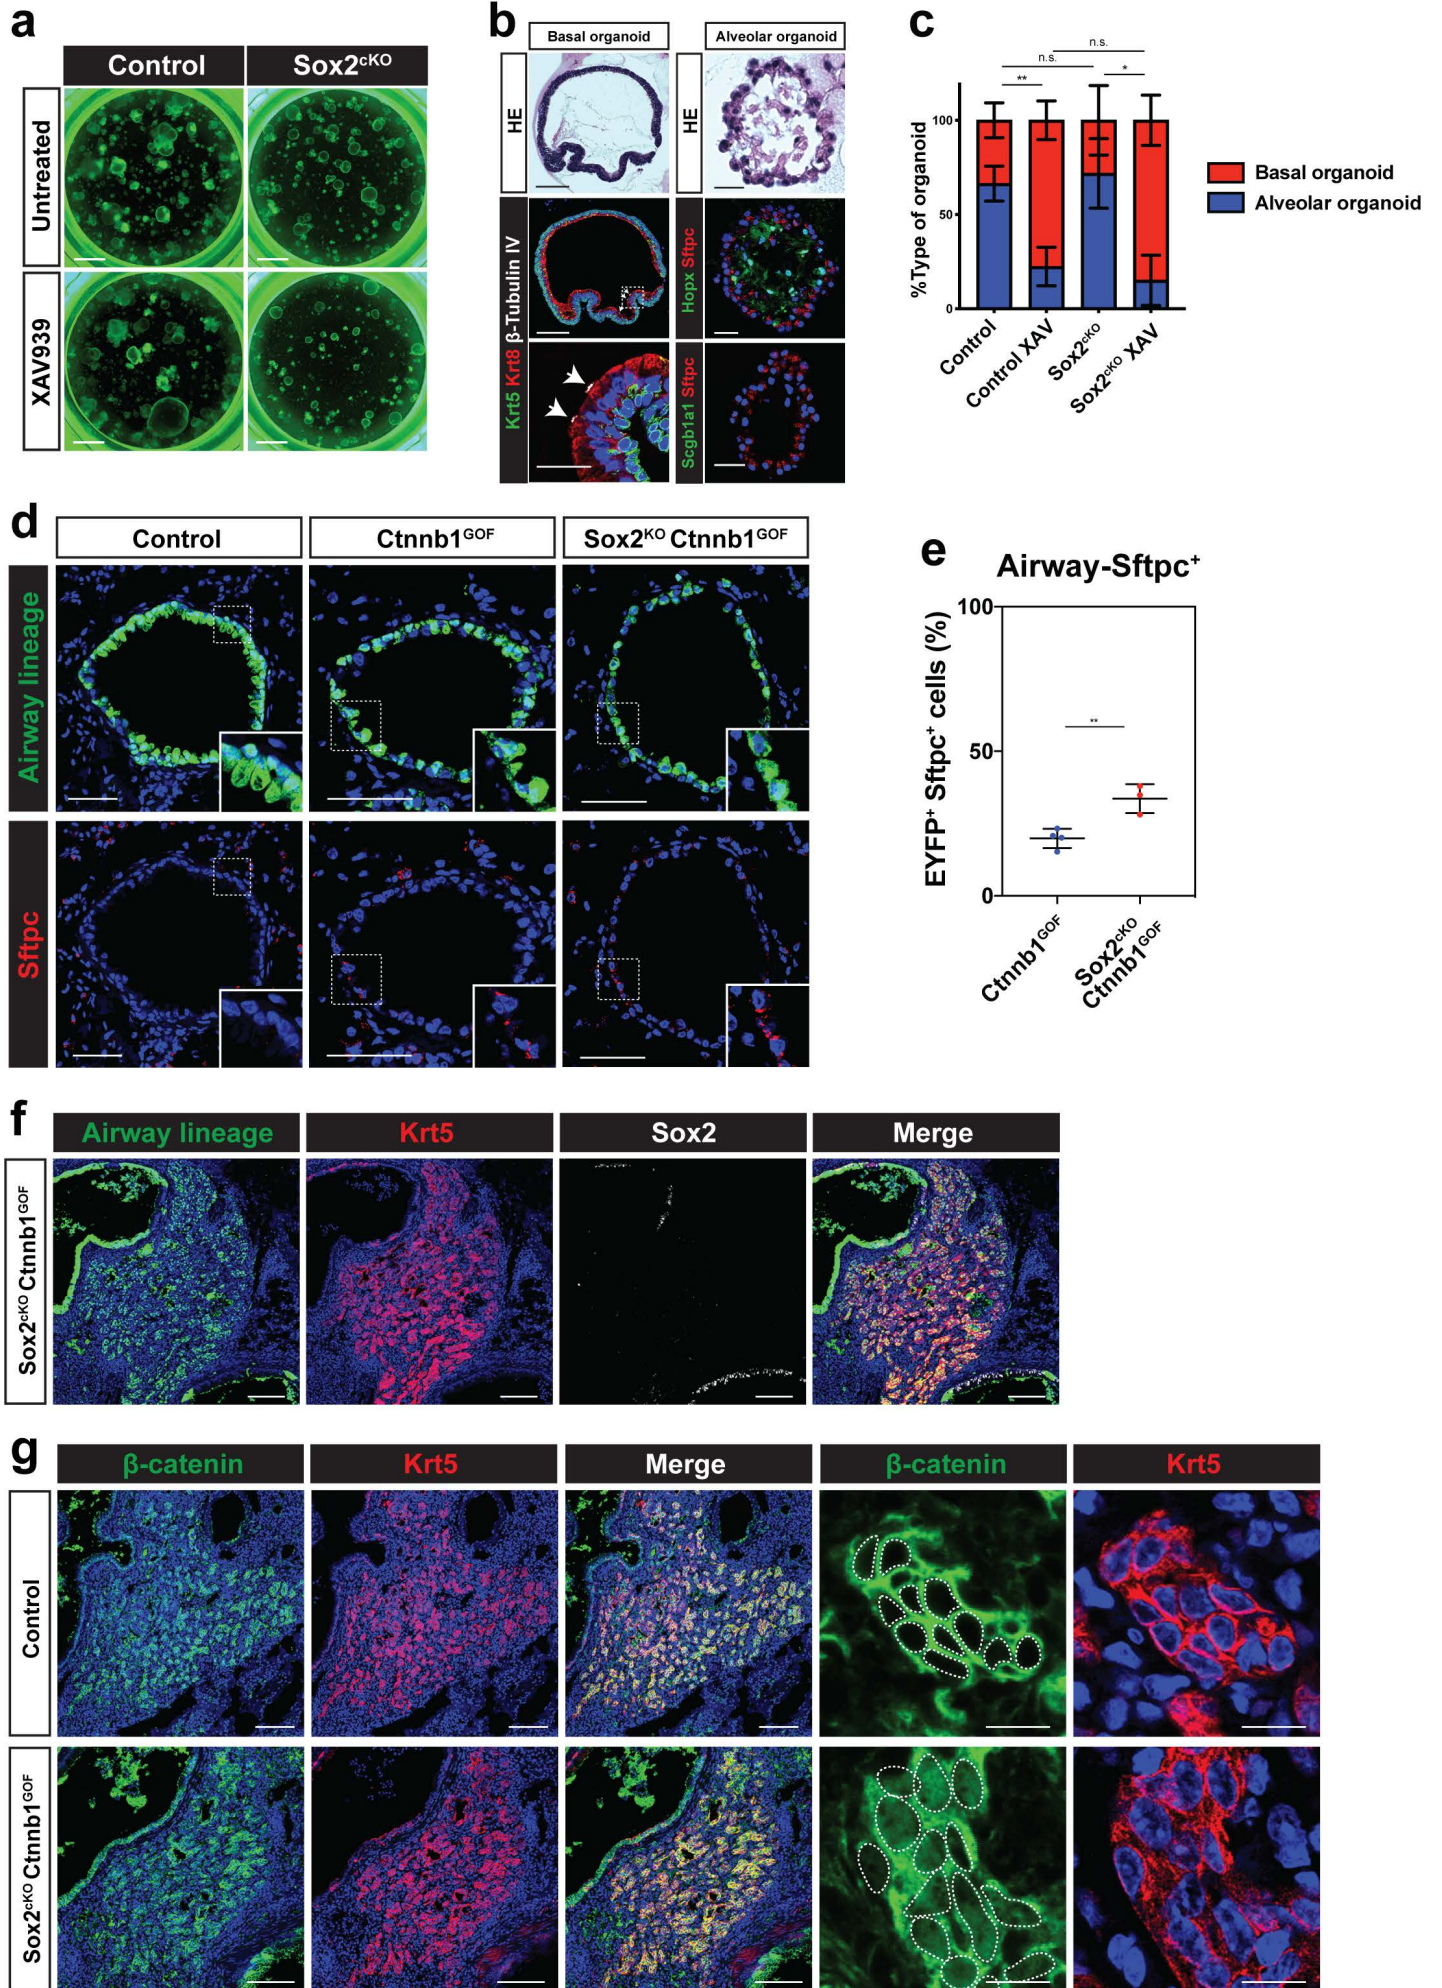

**Supplementary Figure 5. Organoid experiment and additional analysis on *Ctnnb1*<sup>GOF</sup> and *Sox2*<sup>ckO</sup>/*Ctnnb1*<sup>GOF</sup> mice**

a. Airway cells from *Sox2*<sup>CreERT2/wtx; R26R<sup>EYFP</sup></sup> and *Sox2*<sup>CreERT2/Flox; R26R<sup>EYFP</sup></sup> mice were sorted, and organoid assays were performed. XAV939 treatment inhibited alveolar organoid formation from control and *Sox2*<sup>ckO</sup>-derived airway cells (bottom).

b. Representative basal and alveolar organoids.

c. Quantification for the composition of *Krt5*<sup>+</sup> basal and *Sftpc*<sup>+</sup> alveolar organoids within the well. Organoids on the same slide were concurrently stained for *Krt5* and *Sftpc*. Control (n = 4 wells from n = 3 experiments), *Sox2*<sup>ckO</sup> (n = 3 wells and experiments), control airway cells treated with XAV939 (n = 3 wells and experiments), *Sox2*<sup>ckO</sup> airway cells treated with XAV939 (n = 3 wells and experiments).

d-e. *Ctnnb1*<sup>GOF</sup> and *Sox2*<sup>ckO</sup>/*Ctnnb1*<sup>GOF</sup> airway cells express *Sftpc* during homeostasis (d). Quantification of *Sftpc*<sup>+</sup> cells during homeostasis from n = 4 *Ctnnb1*<sup>GOF</sup> and n = 3 *Sox2*<sup>ckO</sup>/*Ctnnb1*<sup>GOF</sup> mice (e).

f. Tiled image showing that *Sox2* is not expressed in *Krt5*<sup>+</sup> dysplastic epithelium from *Sox2*<sup>ckO</sup>/*Ctnnb1*<sup>GOF</sup> mice.

g. *Krt5*<sup>+</sup> dysplastic epithelium from *Sox2*<sup>ckO</sup>/*Ctnnb1*<sup>GOF</sup> mice shows nuclear  $\beta$ -catenin signal. Left three images are tiled images.

Scale bars: a, 1 mm; b (left), f, g (left three), 100  $\mu$ m; d, 50  $\mu$ m; b (right), 25  $\mu$ m; g (right two), 10  $\mu$ m.

\*\* P < 0.01, and \* P < 0.05 by two-tailed t-test. N.S., not significant, P > 0.05 by two-tailed t-test. Each dot represents an individual mouse or well, and error bars indicate mean with s.d.

# Supplementary Figure 6

a

Healthy

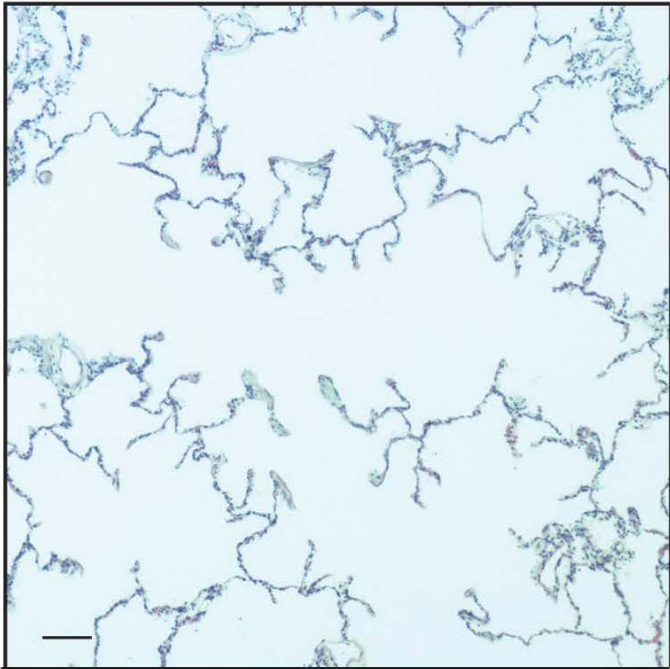

IPF

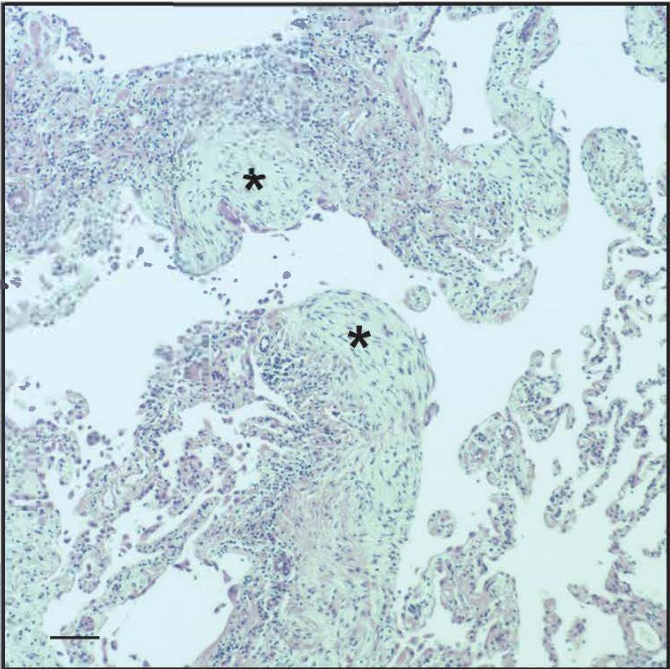

b

KRT5

KRT17

SOX2

Merge

IPF foci

Fibroblastic Foci

Fibroblastic Foci

Fibroblastic Foci

Fibroblastic Foci

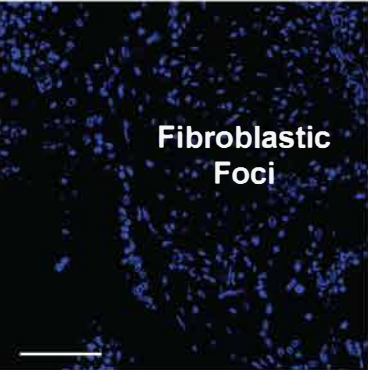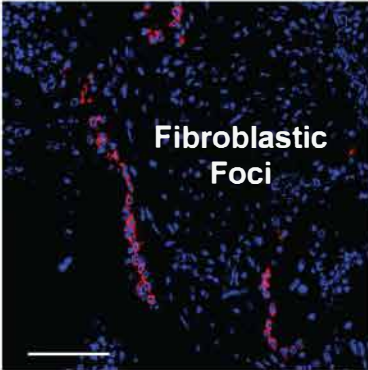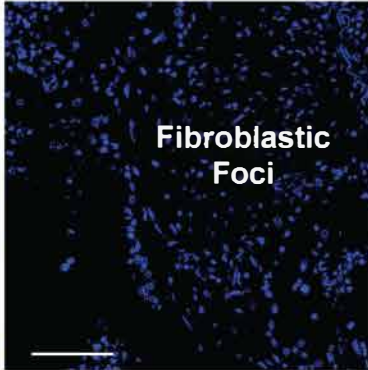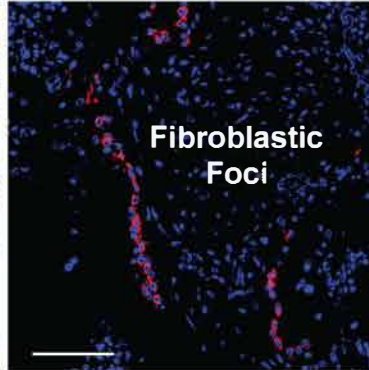

Supplementary Figure 6. Additional histological evaluation of IPF

a. H&E staining of healthy and IPF lung tissue. IPF tissue shows fibroblastic foci and thickened alveoli.

Asterisks denote fibroblastic foci.

b. KRT5-/KRT17+ dysplastic cells are TP63+ at the fibroblastic foci.

Scale bars: a, b, 100 μm.

# Supplementary Figure 7

**a**

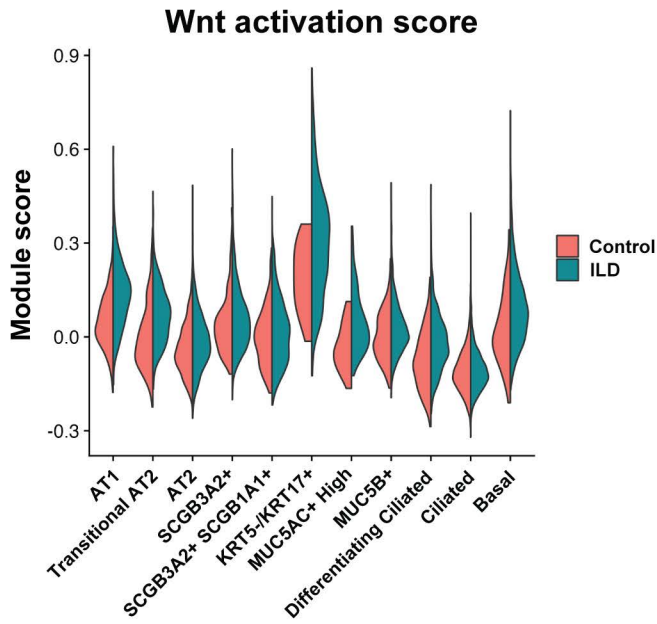

**b**

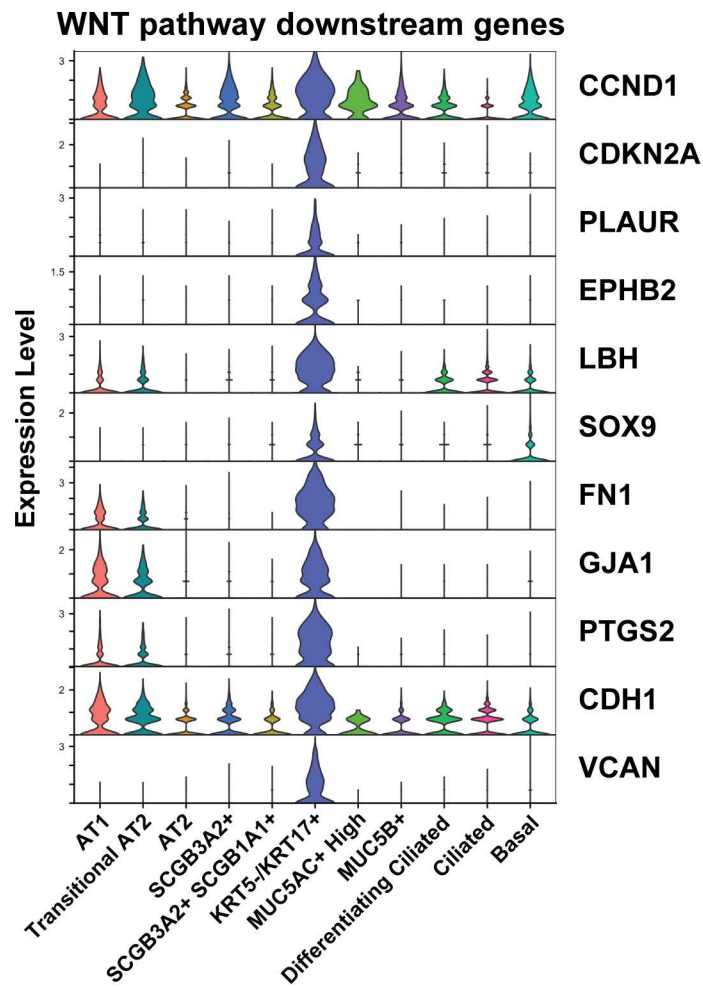

**c**

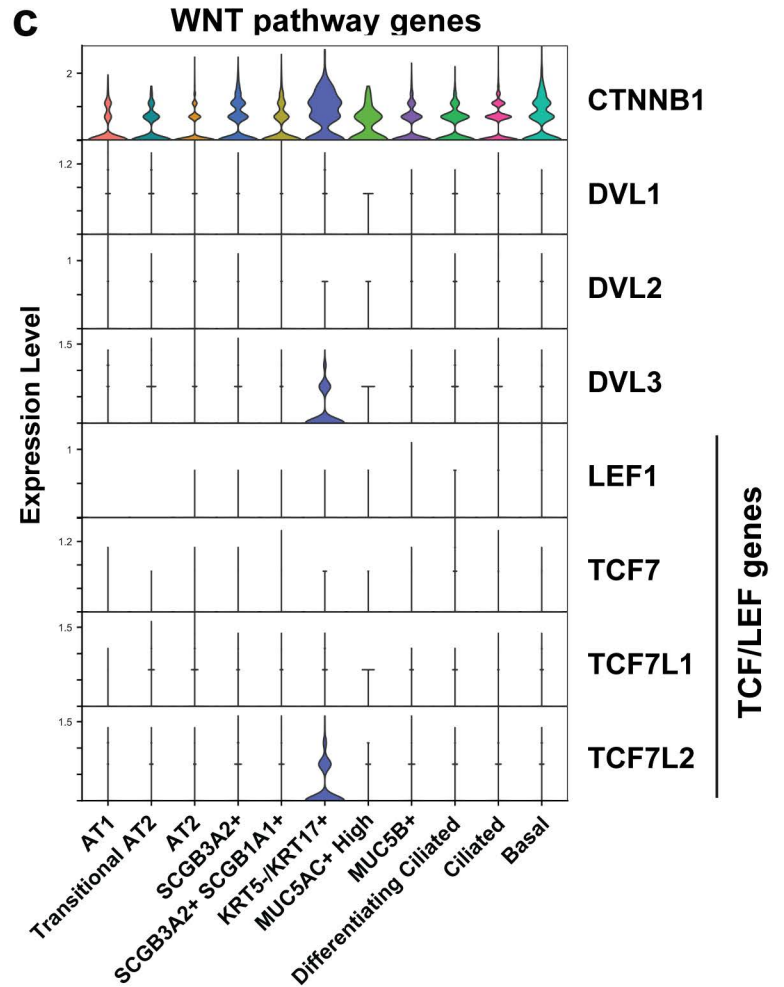

**d**

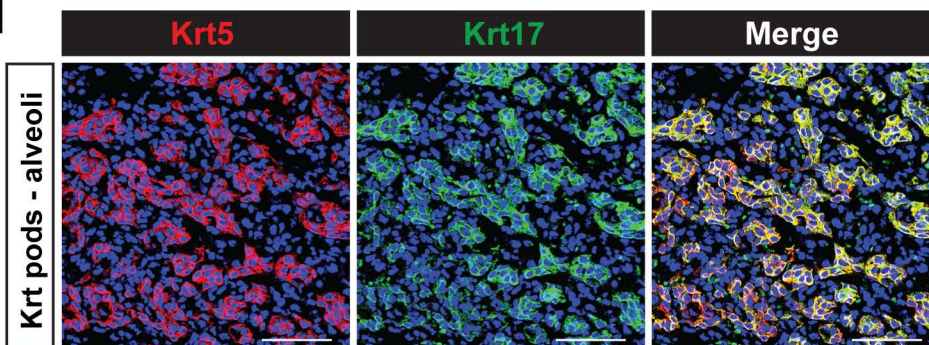

## **Supplementary Figure 7. WNT pathway and downstream gene expression in KRT17<sup>+</sup> dysplastic epithelial cells**

a. Violin plot showing Wnt activation scores comparing epithelial cells from healthy controls and patients with pulmonary fibrosis.

b. Violin plots showing higher expression of WNT pathway downstream genes in KRT5<sup>-</sup>/KRT17<sup>+</sup> dysplastic epithelial cells.

c. Violin plots showing higher expression of CTNNB1, DVL3, and TCF7L2 in KRT5<sup>-</sup>/KRT17<sup>+</sup> dysplastic epithelial cells.

d. Mouse Krt5<sup>+</sup> epithelium also expresses Krt17. Scale bars: 50  $\mu$ m.

## Supplementary Table 1. Module genes

| AT2 transcriptional signature genes used for Figure 2 |
|-------------------------------------------------------|
| Sftpc                                                 |
| Lamp3                                                 |
| Slc34a2                                               |
| Sftpb                                                 |
| Sftpa1                                                |
| Cxcl15                                                |
| Npc2                                                  |
| Dram1                                                 |
| Sfta2                                                 |
| Bex4                                                  |
| Ppp1r14c                                              |
| Abca3                                                 |
| Sftpd                                                 |

| Wnt target genes used for Figure 3 |
|------------------------------------|
| Myc                                |
| Ccnd1                              |
| Jun                                |
| Tcf4                               |
| Cd44                               |
| Ephb2                              |
| Bmp4                               |
| Vegfa                              |
| Met                                |
| Mycbp                              |
| Id2                                |
| Jag1                               |
| Msl1                               |
| Tiam1                              |
| Nos2                               |
| Lbh                                |
| Ccn1                               |
| Pttg1                              |
| Dll1                               |
| Fn1                                |
| Gja1                               |
| Gjb6                               |
| Rarg                               |
| Enpp2                              |
| Tbx1                               |
| Ptgs2                              |
| Irx3                               |
| Emp1                               |
| Emp2                               |
| Btrc                               |
| Egfr                               |
| Cdh1                               |
| Klf5                               |
| Ret                                |
| Krt5                               |
| Krt14                              |
| Fgfr2                              |

| WNT target genes used for Figure 7 |
|------------------------------------|
| MYC                                |
| CCND1                              |
| JUN                                |
| PLAUR                              |
| MMP7                               |
| TCF4                               |
| CD44                               |
| EPHB2                              |
| BMP4                               |
| CLDN1                              |
| BIRC5                              |
| VEGFA                              |
| MET                                |
| EDN1                               |
| MYCBP                              |
| ID2                                |
| JAG1                               |
| MSL1                               |
| LBH                                |
| SOX9                               |
| RUNX2                              |
| CYR61                              |
| SOX2                               |
| PTTG1                              |
| FN1                                |
| GJA1                               |
| RHOA                               |
| TNFSF9                             |
| PTGS2                              |
| IRX3                               |
| EMP1                               |
| EMP2                               |
| EGFR                               |
| CDH1                               |
| CDKN2A                             |
| KLF5                               |
| CXCL8                              |
| VCAN                               |
| TNFRSF19                           |
| KRT5                               |

**Supplementary Table 2. Patient characteristics**

| <b>ID</b> | <b>AGE</b> | <b>Cause of Death /<br/>Disease at Transplant</b> | <b>GENDER</b> | <b>RACE</b>     |
|-----------|------------|---------------------------------------------------|---------------|-----------------|
| Donor_1   | 53         | N/A                                               | Female        | White/Caucasian |
| Donor_2   | 57         | N/A                                               | Male          | Hispanic/Latino |
| Donor_3   | 76         | N/A                                               | Female        | White/Caucasian |
| Donor_4   | 48         | N/A                                               | Male          | White/Caucasian |
| IPF_1     | 65         | IPF                                               | Male          | East Indian     |
| IPF_2     | 69         | IPF                                               | Male          | White/Caucasian |
| IPF_3     | 68         | IPF                                               | Male          | White/Caucasian |
| IPF_4     | 58         | IPF                                               | Male          | White/Caucasian |
| IPF_5     | 70         | IPF                                               | Male          | White/Caucasian |
| COVID19_1 | 54         | Post-COVID fibrosis                               | Male          | White/Caucasian |
| COVID19_2 | 53         | Post-COVID fibrosis                               | Male          | White/Caucasian |
| COVID19_3 | 54         | Post-COVID fibrosis                               | Male          | White/Caucasian |
